# Supplementary material
Source: publisher figshare collection journal article supplement (https://adisjournals.figshare.com/ndownloader/files/35988179)
Supplement: Supplementary file 1 [file 35988179]

Solriamfetol Titration & AdministRaTion (START) in Patients With Obstructive Sleep Apnea: A Retrospective Chart Review and Hypothetical Patient Scenario

Haramandeep Singh, MD; Danielle Hyman, PhD; Gregory S. Parks, PhD; Abby Chen, MS; Catherine Foley, MPH, MA; Beth Baldys, MA; Diane Ito, MA; Michael J. Thorpy, MD

How do physicians prescribing solriamfetol for patients with excessive daytime sleepiness (EDS) in OSA formulate and execute initiation and titration strategies?

Study Design

- 26 US-based physicians prescribing solriamfetol participated in a retrospective chart review and 24 provided data from 50 patients with OSA
- Solriamfetol initiation strategies were categorized as:
  - de novo – EDS medication-naïve
  - transition – switched/switching from existing EDS medication(s) to solriamfetol
  - add-on – adding solriamfetol to current EDS medication(s)

Results

Patients with OSA

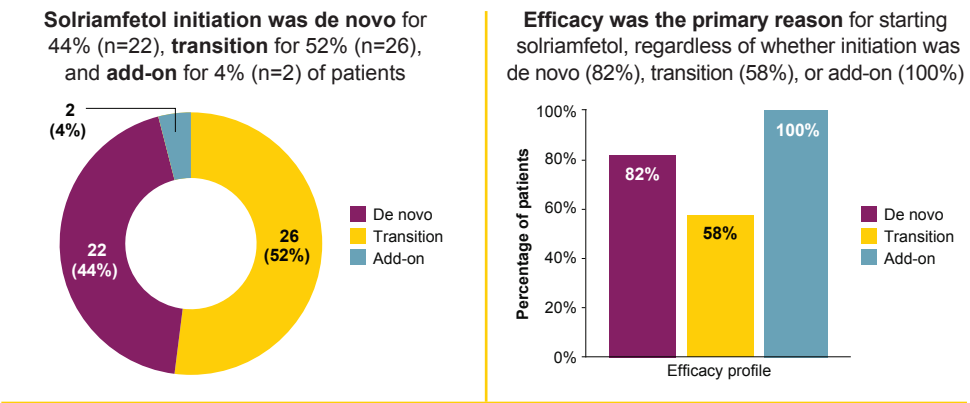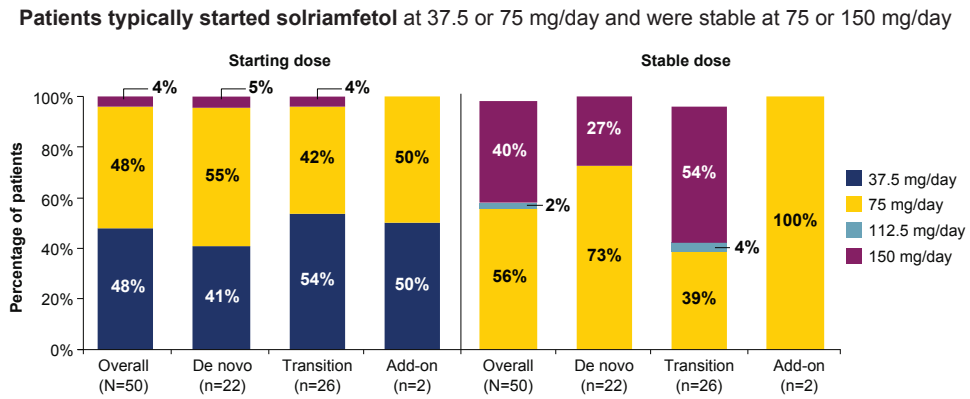

Most patients (64%) had 1 dose adjustment, and median time to a stable dose was 14 days  
96% of patients were still on a stable dose of solriamfetol at data collection

Physicians abruptly discontinued wake-promoting agents (17/18, 94%) and stimulants (6/9, 67%) for transitioning patients

Key Takeaway

Physicians typically started solriamfetol due to its efficacy profile or a desire for improved efficacy, initiated solriamfetol at 37.5 mg/day or 75 mg/day, and made 1 adjustment to reach a stable dose of solriamfetol over a median of 14 days. Most patients (96%) were stable on solriamfetol at the time of data collection.
